# Supplementary material
Source: PubMed Central journal article supplement (PMC7720734)

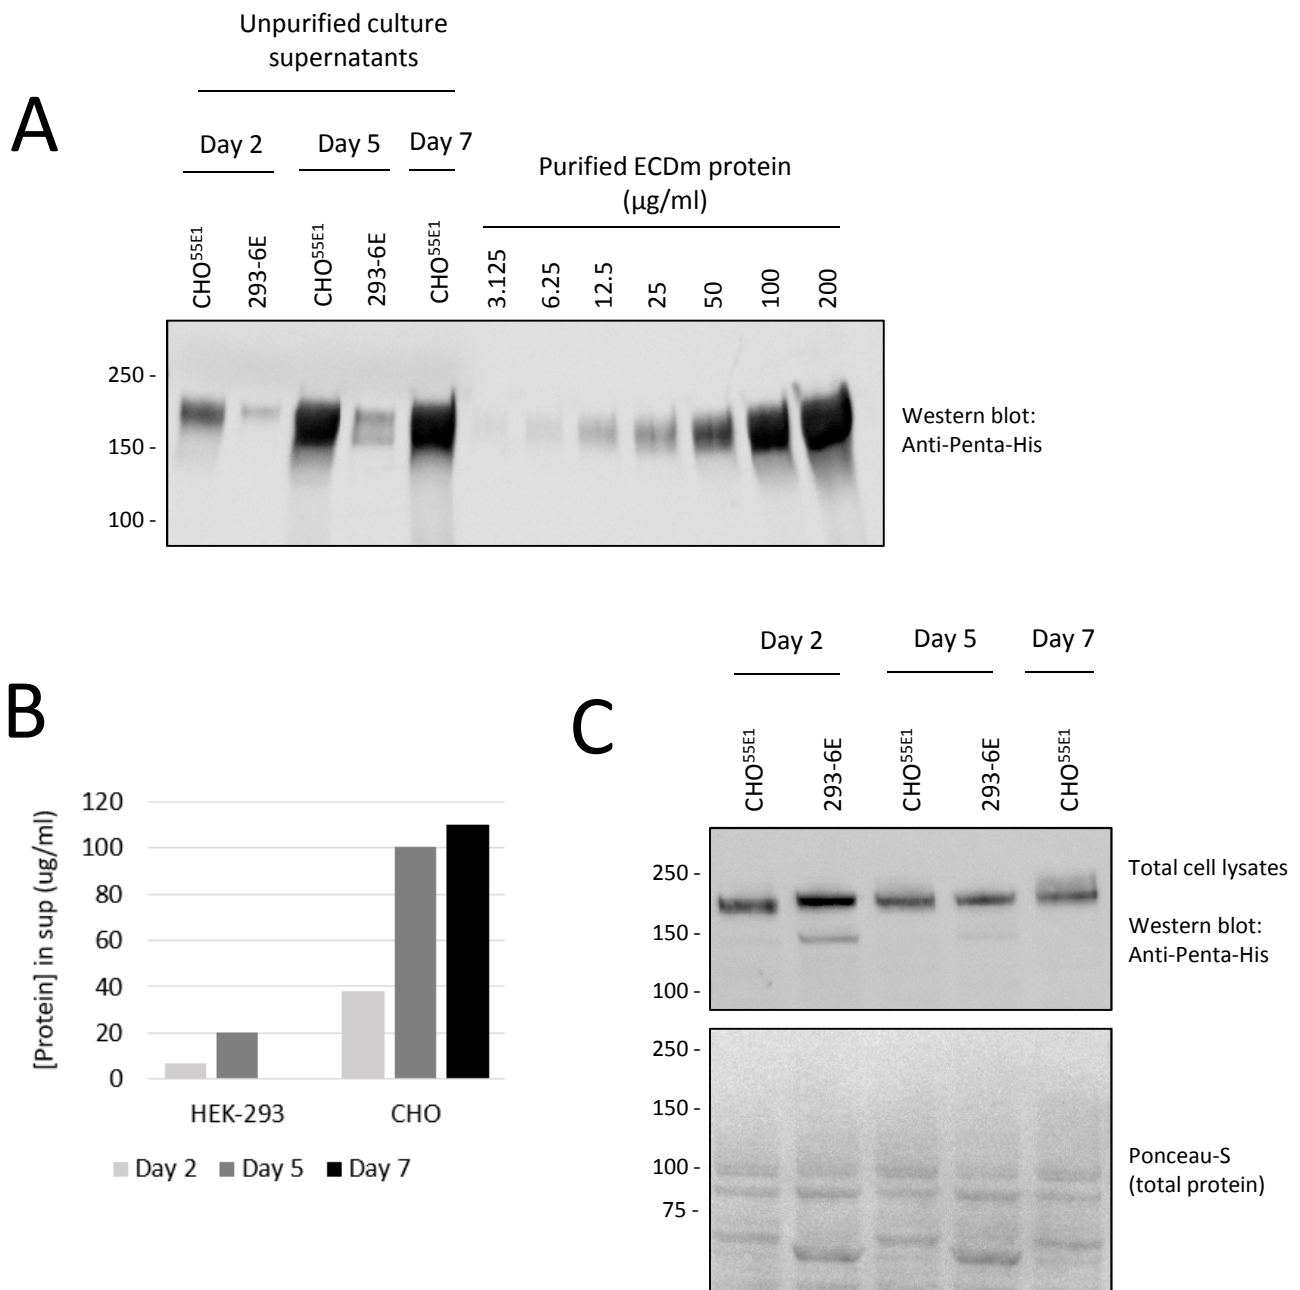

Supplementary Figure 1

Supplement: mmc1.pdf [file mmc1.pdf]
